# Supplementary material
Source: PubMed Central journal article supplement (PMC4156507)
Supplement: rna-11-766-s01.pdf [file rna-11-766-s01.pdf]

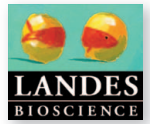

## **Supplemental Material to:**

**Isabel Cruz-Gallardo, Ángeles Aroca, Menachem J Gunzburg, Andrew Sivakumaran, Je-Hyun Yoon, Jesús Angulo, Cecilia Persson, Myriam Gorospe, B Göran Karlsson, Jacqueline A Wilce, and Irene Díaz-Moreno**

**The binding of TIA-1 to RNA C-rich sequences is driven by its C-terminal RRM domain**

**2014; 11(6)**

**<http://dx.doi.org/10.4161/rna.28801>**

**[www.landesbioscience.com/journals/rnabiology/article/28801/](http://www.landesbioscience.com/journals/rnabiology/article/28801/)**

# **The binding of TIA-1 to RNA C-rich sequences is driven by its C-terminal RRM domain**

## **Supplementary material**

**Isabel Cruz-Gallardo<sup>1</sup>, Ángeles Aroca<sup>1</sup>, Menachem J. Gunzburg<sup>2</sup>,  
Andrew Sivakumaran<sup>2</sup>, Je-Hyun Yoon<sup>6</sup>, Jesús Angulo<sup>3,4</sup>, Cecilia Persson<sup>5</sup>, Myriam  
Gorospé<sup>6</sup>, B. Göran Karlsson<sup>5</sup>, Jacqueline A. Wilce<sup>2</sup> and Irene Díaz-Moreno<sup>1\*</sup>**

<sup>1</sup>Instituto de Bioquímica Vegetal y Fotosíntesis, Centro de Investigaciones Científicas Isla de la Cartuja, Universidad de Sevilla-CSIC, Sevilla, Spain.

<sup>2</sup>Department of Biochemistry and Molecular Biology, Monash University, Victoria 3800, Australia.

<sup>3</sup>Instituto de Investigaciones Químicas, Centro de Investigaciones Científicas Isla de la Cartuja, Universidad de Sevilla-CSIC, Sevilla, Spain.

<sup>4</sup>School of Pharmacy, University of East Anglia. Norwich Research Park, Norwich NR4 7TJ, UK.

<sup>5</sup>Swedish NMR Centre, University of Gothenburg, Gothenburg, Sweden.

<sup>6</sup>Laboratory of Genetics, National Institute on Aging-Intramural Research Program, NIH, Baltimore MD, USA

**\*Corresponding author.** Email: [idiazmoreno@us.es](mailto:idiazmoreno@us.es)

**Figure S1. Binding of TIA-1 RRM3 to one of the “good RNA targets”.** *Left.*- Averaged chemical-shifts changes of RRM3 upon addition of GCUCC to a protein:RNA ratio of 1:1.5. *Middle.*- Ribbon mapping of  $\Delta\delta_{\text{avg}}$ . Residues with  $0.013 \leq \Delta\delta_{\text{avg}} \leq 0.02$  ppm are yellow and those with  $\Delta\delta_{\text{avg}} > 0.02$  are in orange. Prolines and not assigned residues are in grey whereas those non perturbed residues are colored in blue. *Right.*- TIA-1 RRM3 surface with the same orientation and color code as *Middle*. Note that G273 and T276 residues are colored in red because of their NH amide signals are broadening beyond the detection limit. The white asterisk (\*) indicates that W272 corresponds to the N<sup>ε</sup> nucleus in the indole ring. The structure representations were created with Chimera software<sup>1</sup> using the file generated from chemical shifts assignments of RRM3 domain (BMRB accession number 18829) at the CS23D2.0 web server.<sup>2</sup>

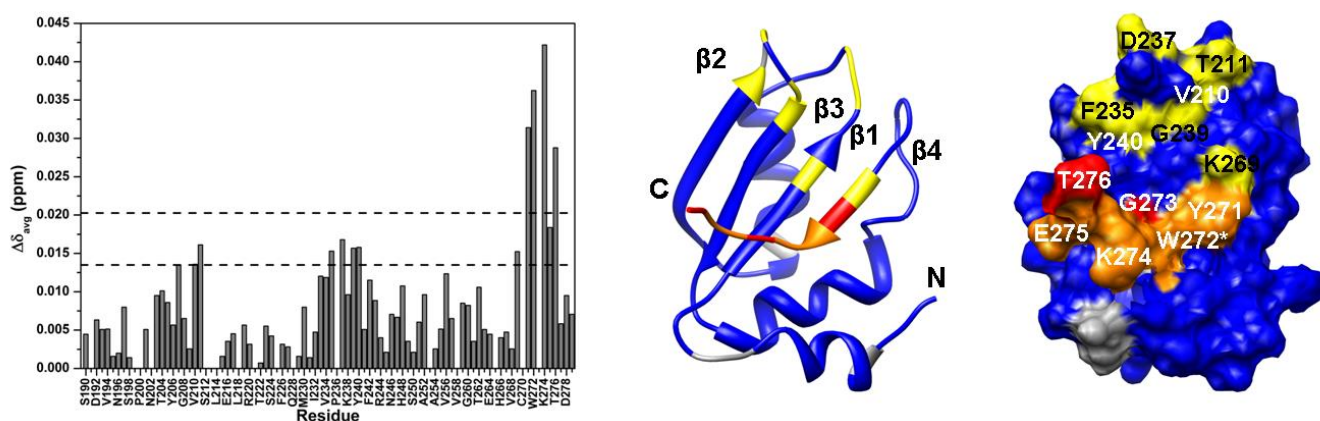

**Figure S2. Binding isotherms from STD-AF values during the titration of RRM3 with the ACCCC and GCUCC oligos**

**ACCCC**

$K_D = 1100 \pm 480 \mu\text{M}$

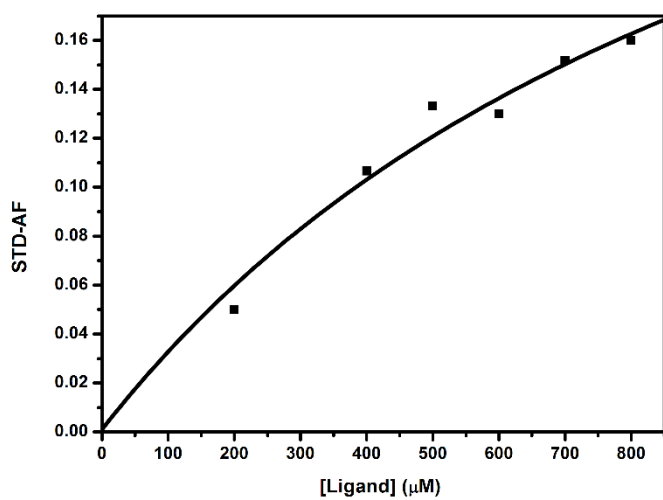

**GCUCC**

$K_D = 155 \pm 41 \mu\text{M}$

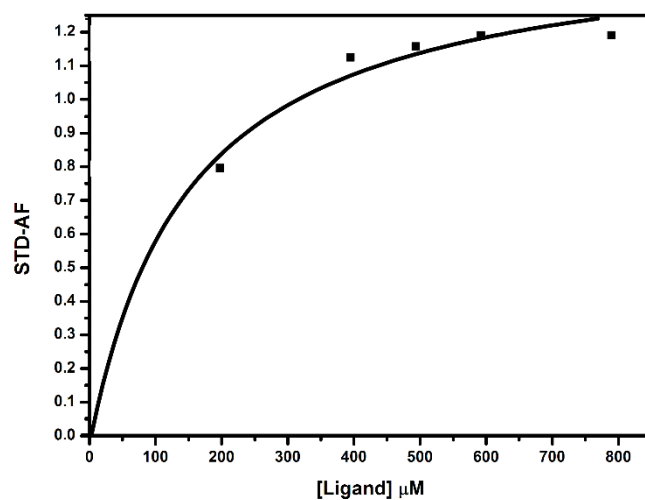

**Figure S3. SPR Analysis of the interactions of different TIA-1 constructs with 5' UUGCCACCUCUGCUCCUGCCCAGA 3' RNA.** The binding of TIA-1 RRM2 (top) and TIA-1 RRM23 (bottom) to the RNA sequence is shown. RNA, biotinylated at the 5'-end, were captured on SA coated sensor chips in parallel. Each protein was injected across the four flow cells (blank cell and a cell for the RNA sequence) at a range of concentrations and in triplicate. Injections were performed for 180 seconds (association phase), followed by a 360-second flow of running buffer to assess dissociation. The data were used to construct binding curves for  $K_D$  determination or approximation (where steady state binding was not achieved).

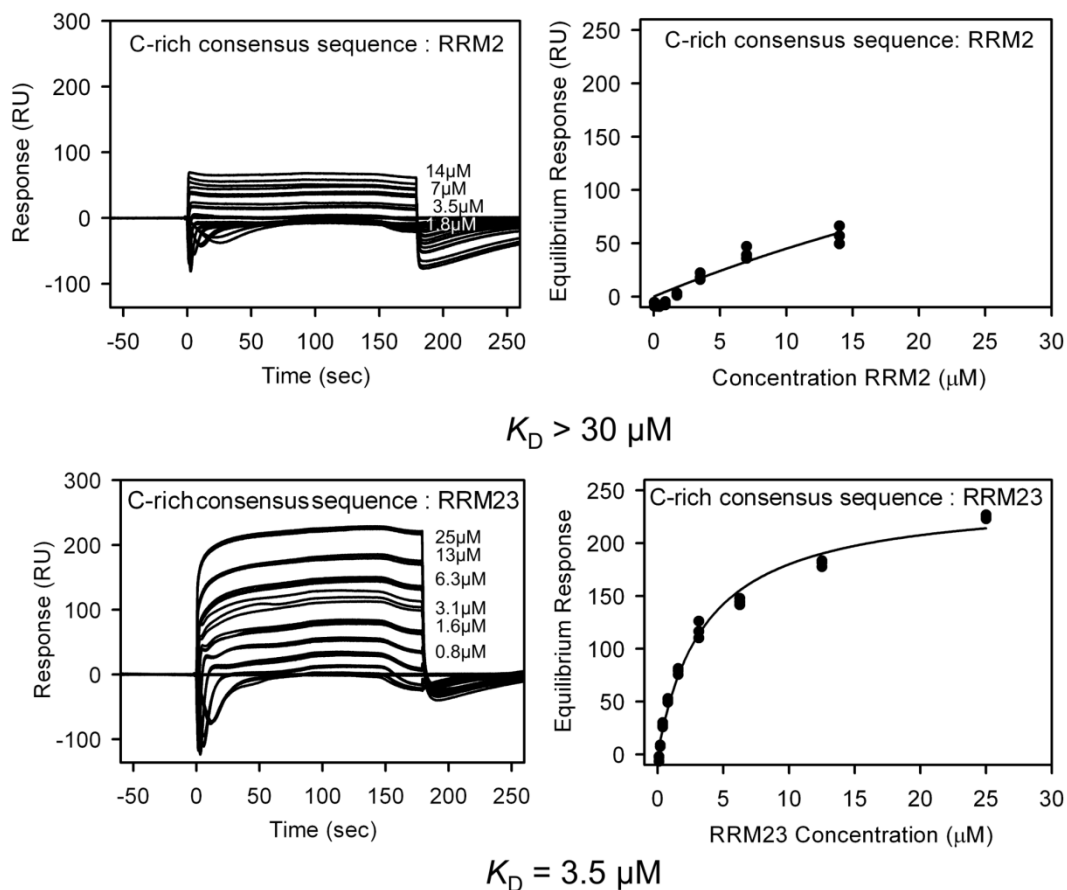

## References

1. Pettersen EF, Goddard TD, Huang CC, Couch GS, Greenblatt DM, Meng EC, Ferrin TE. UCSF Chimera—a visualization system for exploratory research and analysis. *J Comput Chem* 2004; 25: 1605–1612.
2. Wishart DS, Arndt D, Berjanskii M, Tang P, Zhou J, Lin G. CS23D: a web server for rapid protein structure generation using NMR chemical shifts and sequence data. *Nucleic Acids Res* 2008; 36: W496–W502.
